# Supplementary material for: The Global, Regional, and National Burden of Adult Lip, Oral, and Pharyngeal Cancer in 204 Countries and Territories: A Systematic Analysis for the Global Burden of Disease Study 2019
Source: PubMed Central journal article supplement (PMC10485745; doi:10.1001/jamaoncol.2023.2960), 2023-09-07
Supplement: jamaoncol-e232960-s002.pdf [file jamaoncol-e232960-s002.pdf]

## Data Sharing Statement

Cunha. The Global, Regional, and National Burden of Adult Lip, Oral, and Pharyngeal Cancer in 204 Countries and Territories. *JAMA Oncol.* Published September 07, 2023.

doi:10.1001/jamaoncol.2023.2960

### Data

**Data available:** Yes

**Data types:** Deidentified participant data, Other (please specify)

**Additional Information:** Some of the data that will be made available are aggregate data.

**How to access data:** Data available for the GBD 2019 Study are available, in compliance with GATHER requirements, on the Global Health Data Exchange (GHDx) and online at:

<https://ghdx.healthdata.org/gbd-2019>

**When available:** With publication

### Supporting Documents

**Document types:** Statistical/analytic code

**How to access documents:** GBD 2019 data can be accessed at:

<http://ghdx.healthdata.org/gbd-2019/code>

**When available:** With publication

### Additional Information

**Who can access the data:** Publicly available online

**Types of analyses:** Publicly available online

**Mechanisms of data availability:** Publicly available online

**Any additional restrictions:** The GBD Study complies with data confidentiality and data use agreements required by data providers worldwide. While we aim to be as transparent as possible, some data may be restricted per provider requirements.
